# Supplementary material for: Luminescent two-way reversible shape memory polymers prepared by hydroxyl–yne click polymerization
Source: Royal Society of Chemistry journal article supplement (doi:10.1039/d0tc03888a), 2020-01-01
Supplement: d0tc03888a1.pdf [file d0tc03888a1.pdf]

## Electronic Supplementary Information

### **Luminescent two-way reversible shape memory polymers prepared by the hydroxyl-yne click polymerization**

*Kaojin Wang,<sup>a</sup> Han Si,<sup>a</sup> Qing Wan,<sup>a</sup> Zhiming Wang, Anjun Qin,<sup>\*a</sup> Ben Zhong Tang<sup>\*a,b</sup>*

<sup>a</sup> State Key Laboratory of Luminescent Materials and Devices, Guangdong Provincial Key Laboratory of Luminescence from Molecular Aggregates, SCUT-HKUST Joint Research Institute, AIE Institute, Center for Aggregation-Induced Emission, South China University of Technology (SCUT), Guangzhou 510640, China.

<sup>b</sup> Department of Chemistry, Hong Kong Branch of Chinese National Engineering Research Center for Tissue Restoration and Reconstruction, The Hong Kong University of Science & Technology (HKUST), Clear Water Bay, Kowloon, Hong Kong, China.

### Scheme S1. Synthetic routes to dipropiolates and PCL-4OH prepolymers

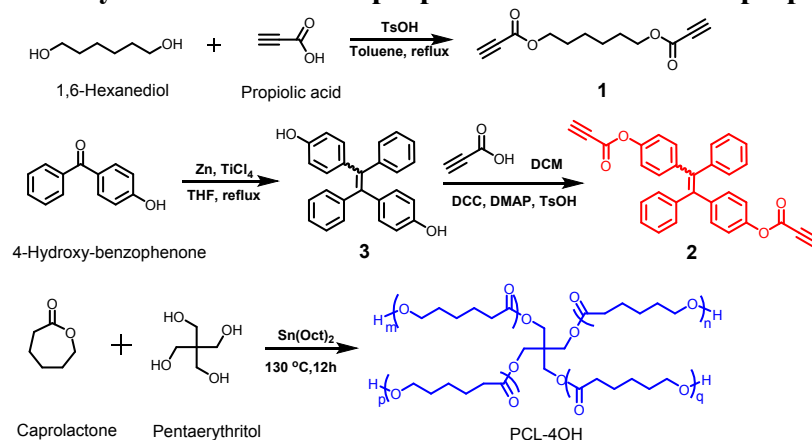

**Table S1. Molecular weights and thermal properties of PCL-4OH prepolymers**

| $M_{n,\text{NMR}}^a$<br>(g/mol) | $M_{n,\text{SEC}}^b$<br>(g/mol) | $D^b$ | $T_c^c$ (°C) | $T_m^c$ (°C) | $\Delta H_c^c$ (J/g) | $\Delta H_m^c$ (J/g) |
|---------------------------------|---------------------------------|-------|--------------|--------------|----------------------|----------------------|
| 2200                            | 3800                            | 1.45  | 10.3         | 35.7 (44.2)  | 71.6                 | 68.5                 |
| 3600                            | 5700                            | 1.21  | 21.5         | 42.9 (46.8)  | 77.2                 | 79.1                 |
| 4500                            | 7100                            | 1.25  | 20.3         | 45.8 (50.0)  | 71.9                 | 76.9                 |
| 5800                            | 8000                            | 1.29  | 24.5         | 48.3         | 74.9                 | 79.3                 |

<sup>a</sup> Calculated from the ratio of <sup>1</sup>H NMR signal integral;  $M_n$  = number-average molecular weight. <sup>b</sup> Estimated by SEC in THF on the basis of a polystyrene (PS) calibration;  $D$  = polydispersity index ( $M_w/M_n$ ,  $M_w$  = weight-average molecular weight). <sup>c</sup> Measured by DSC. Defined by crystallization ( $T_c$ ) and melting temperatures ( $T_m$ ).

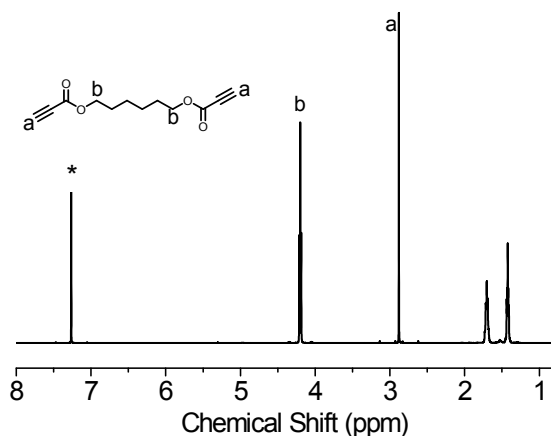

**Figure S1.** <sup>1</sup>H NMR spectrum of dipropiolate **1** in CDCl<sub>3</sub>. The solvent peak is marked with an asterisk.

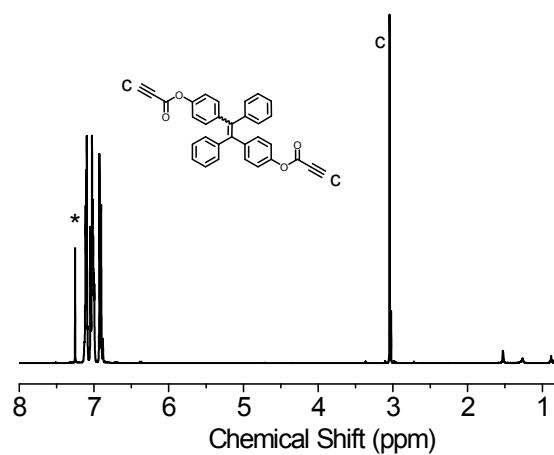

**Figure S2.**  $^1\text{H}$  NMR spectrum of TPE-containing dipropiolate **2** in  $\text{CDCl}_3$ . The solvent peak is marked with an asterisk.

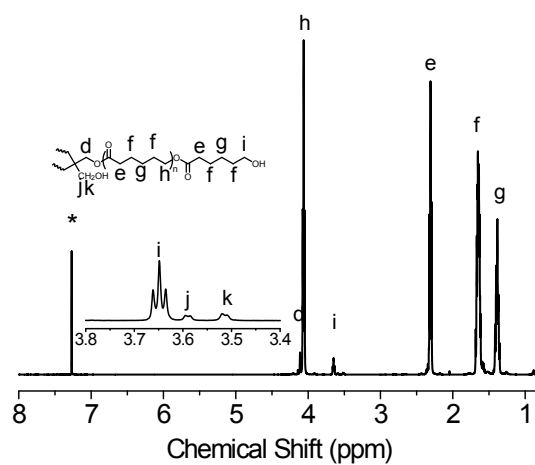

**Figure S3.**  $^1\text{H}$  NMR spectrum of  $\text{PCL}_{3600}\text{-4OH}$  in  $\text{CDCl}_3$ . The solvent peak is marked with an asterisk.

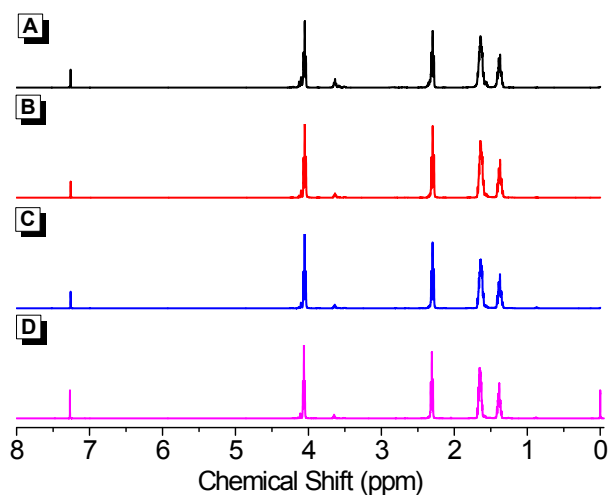

**Figure S4.**  $^1\text{H}$  NMR spectra of PCL<sub>2200</sub>-OH (A), PCL<sub>3600</sub>-OH (B), PCL<sub>4500</sub>-OH (C), and PCL<sub>5800</sub>-4OH (D) in  $\text{CDCl}_3$ . The solvent peaks are marked with asterisks.

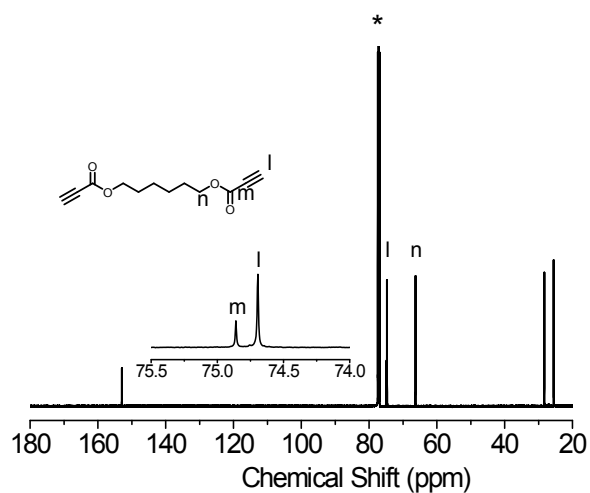

**Figure S5.**  $^{13}\text{C}$  NMR spectrum of dipropiolate **1** in  $\text{CDCl}_3$ . The solvent peak is marked with an asterisk.

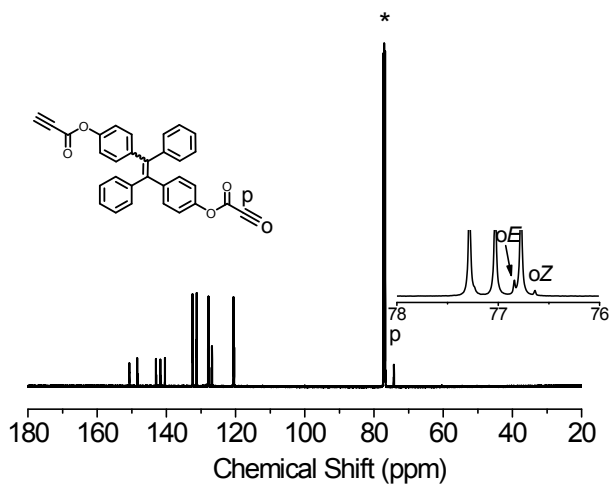

**Figure S6.**  $^{13}\text{C}$  NMR spectrum of TPE-containing dipropiolate **2** in  $\text{CDCl}_3$ . The solvent peak is marked with an asterisk.

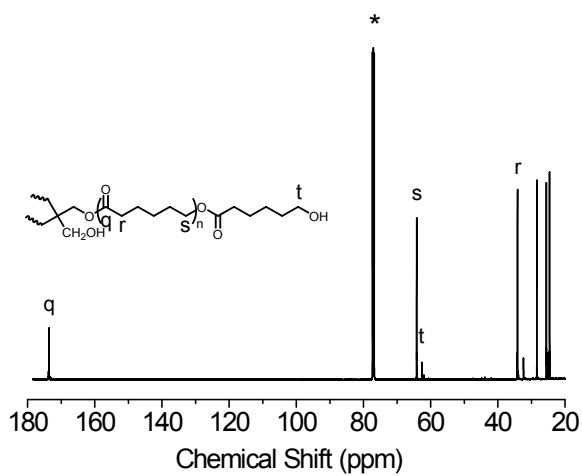

**Figure S7.**  $^{13}\text{C}$  NMR spectrum of  $\text{PCL}_{3600}\text{-4OH}$  in  $\text{CDCl}_3$ . The solvent peak is marked with an asterisk.

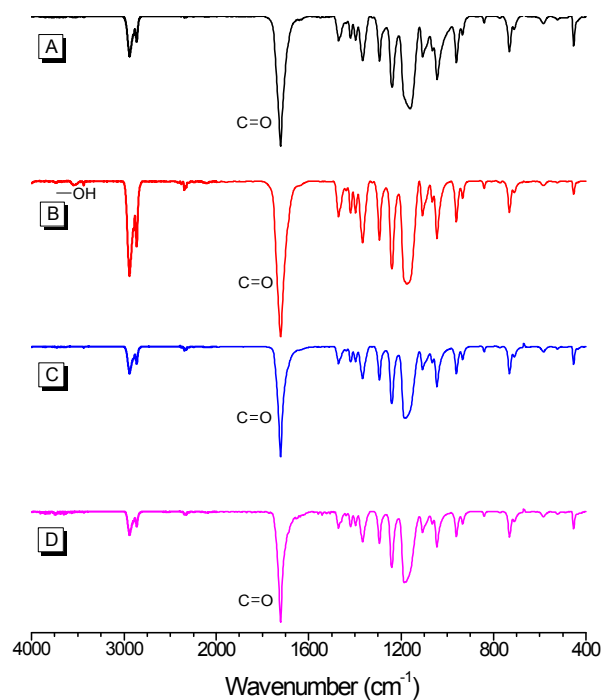

**Figure S8.** FT-IR spectra of PCL<sub>2200</sub>-OH (A), PCL<sub>3600</sub>-OH (B), PCL<sub>4500</sub>-OH (C), and PCL<sub>5800</sub>-4OH (D).

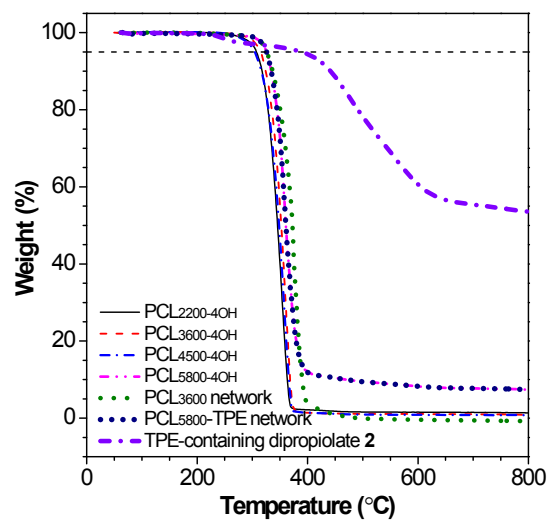

**Figure S9.** TGA curves of PCL-4OH prepolymers, PCL-based networks, and TPE-containing dipropiolate **2**.

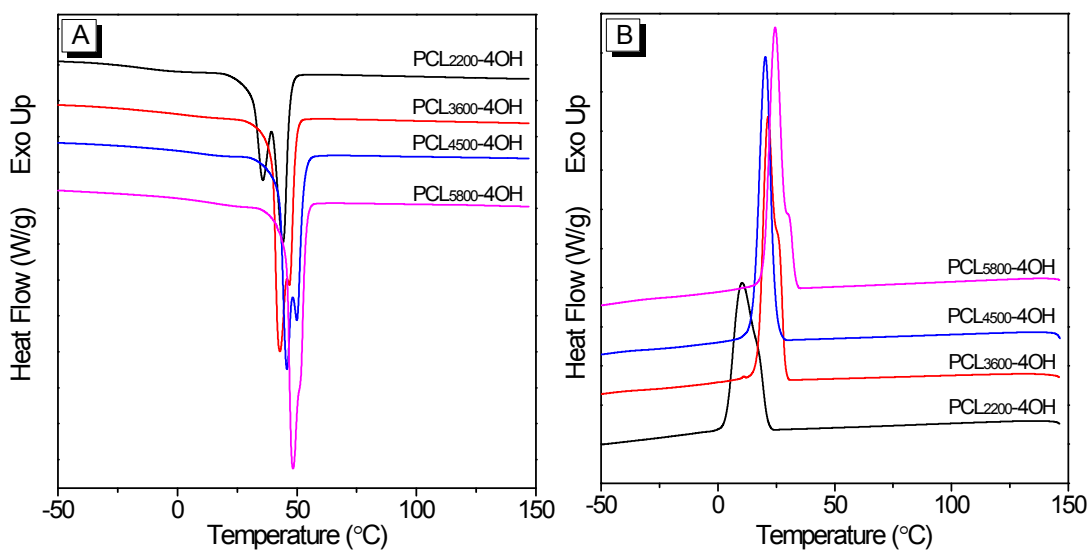

**Figure S10.** DSC heating (A) and cooling (B) curves of PCL-4OH prepolymers.

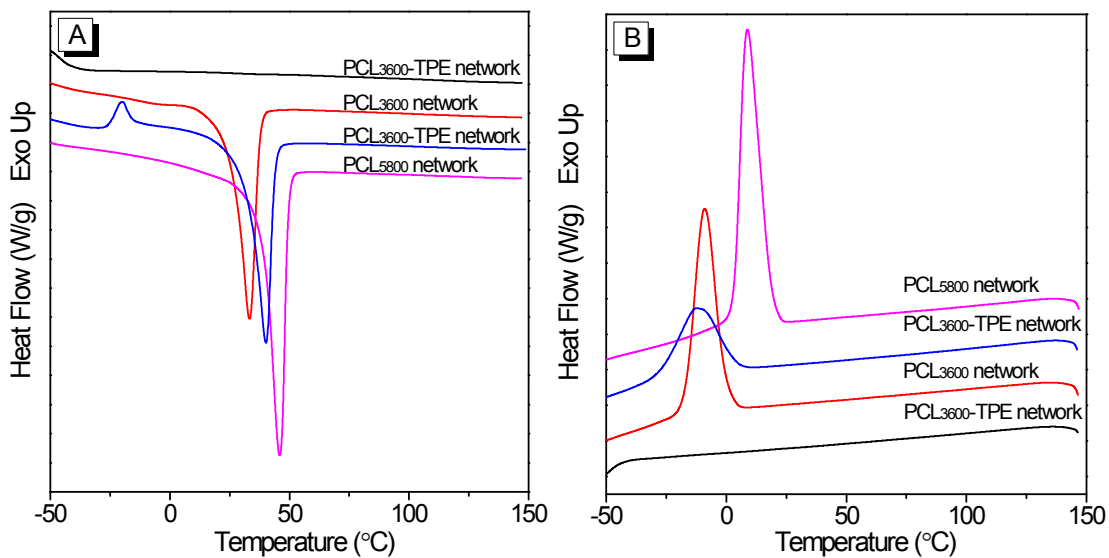

**Figure S11.** DSC curves of heating (A) and cooling (B) processes of PCL-based networks.

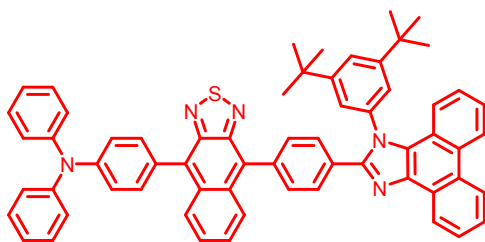

**Figure S12.** Chemical structure of the AIEgen with red emission.
